# Supplementary figures and images for: Nuclear and cytosolic J-domain proteins provide synergistic control of Hsf1 at distinct phases of the heat shock response
Source: eLife journal article supplement (doi:10.7554/elife.107157), 2025-05-14

A

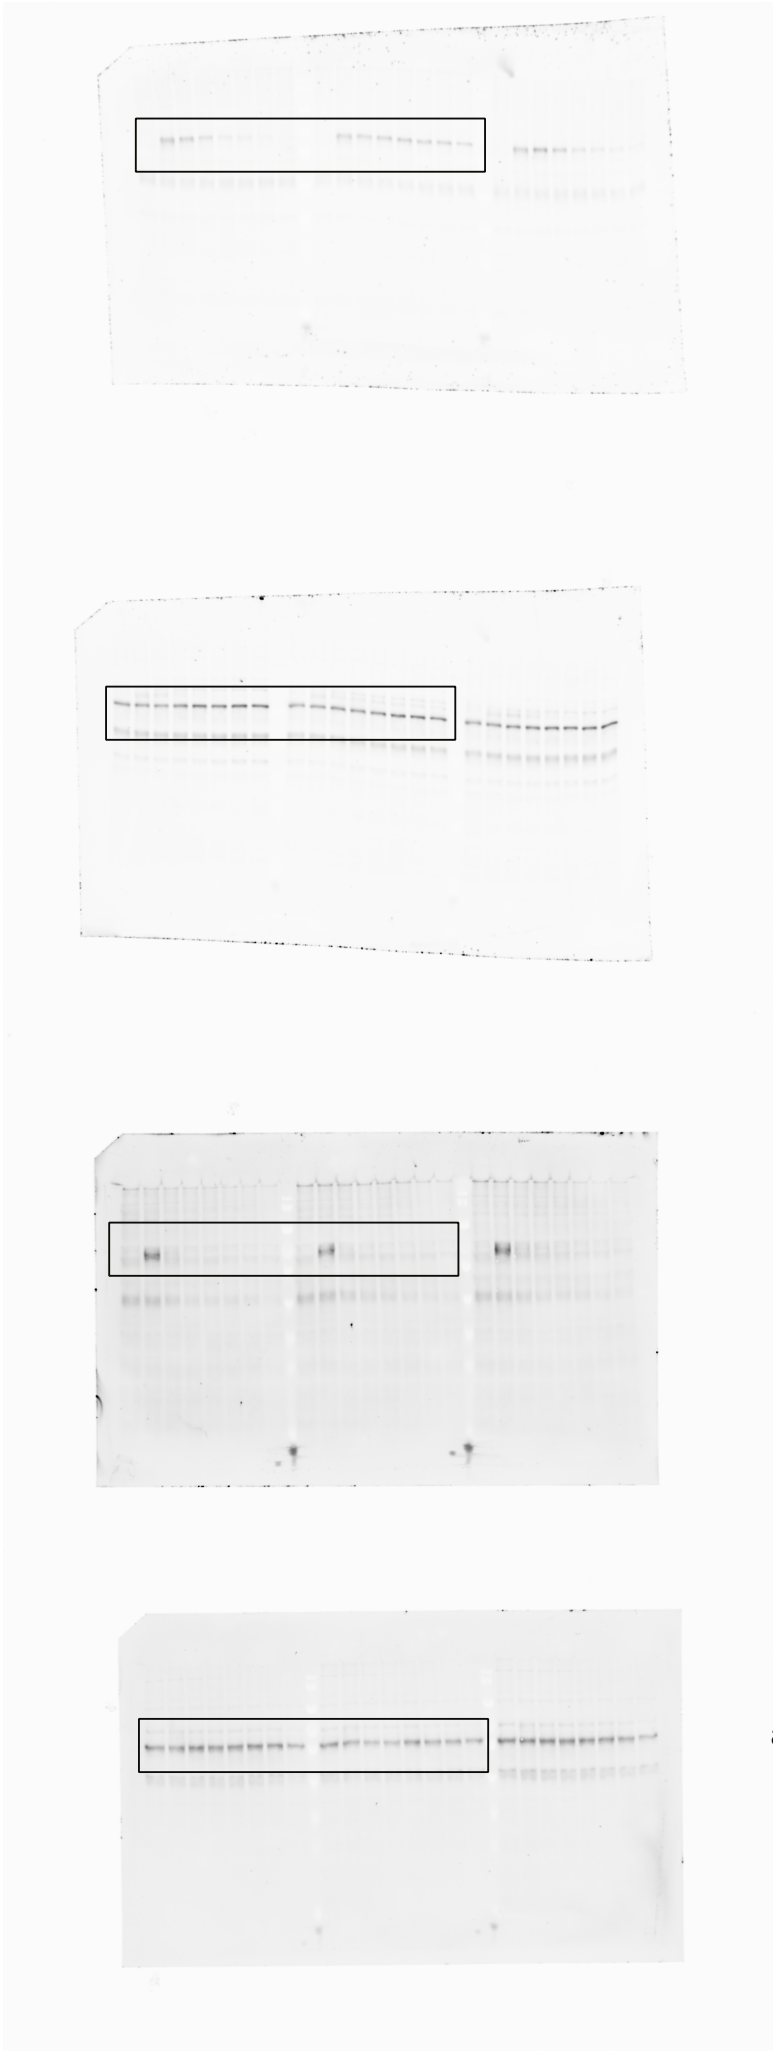

anti-Btn2

anti-Zwf1

B



anti-Btn2

anti-Zwf1

Supplement: fig1-data1 [file elife-107157-fig1-data1-v1.zip]

A

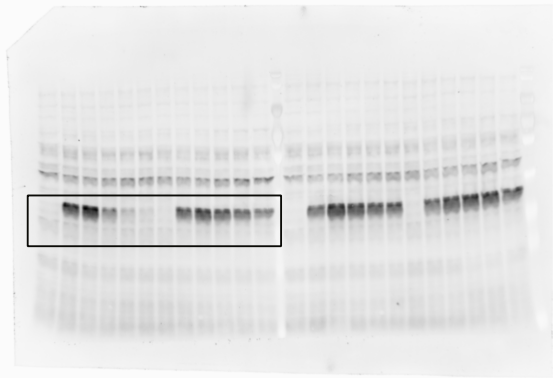

anti-YFP

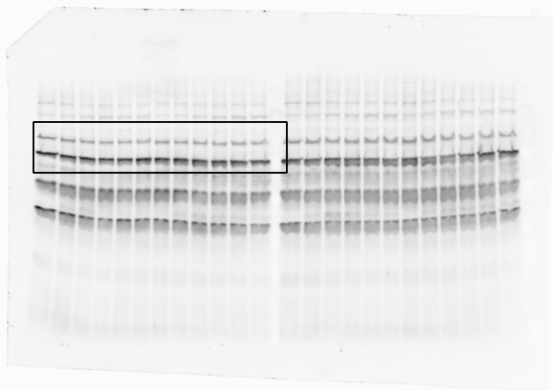

anti-Zwf1

B

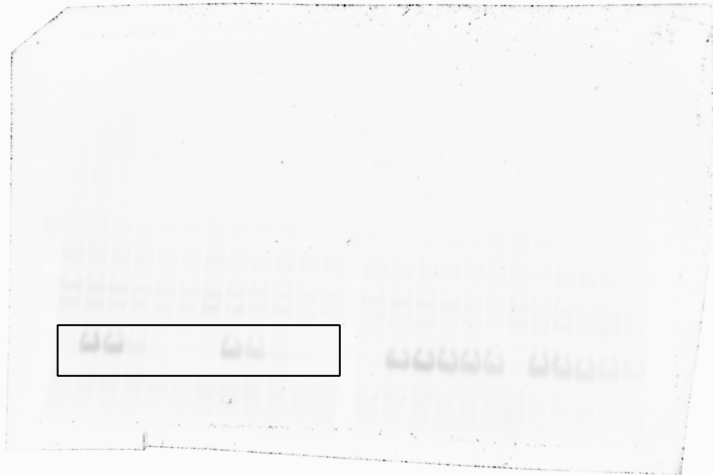

anti-YFP

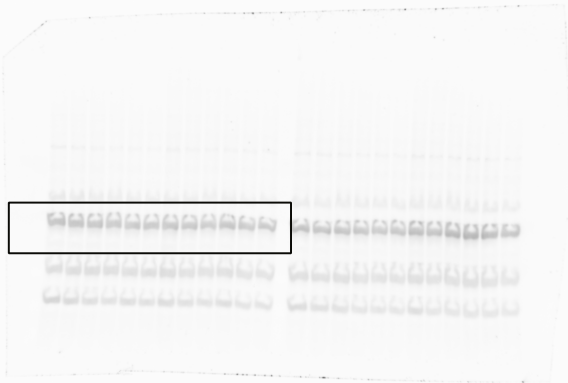

anti-Zwf1

Supplement: fig1-figsupp1-data1 [file elife-107157-fig1-figsupp1-data1-v1.zip]

**Figure 3 - Figure Supplement 1A**

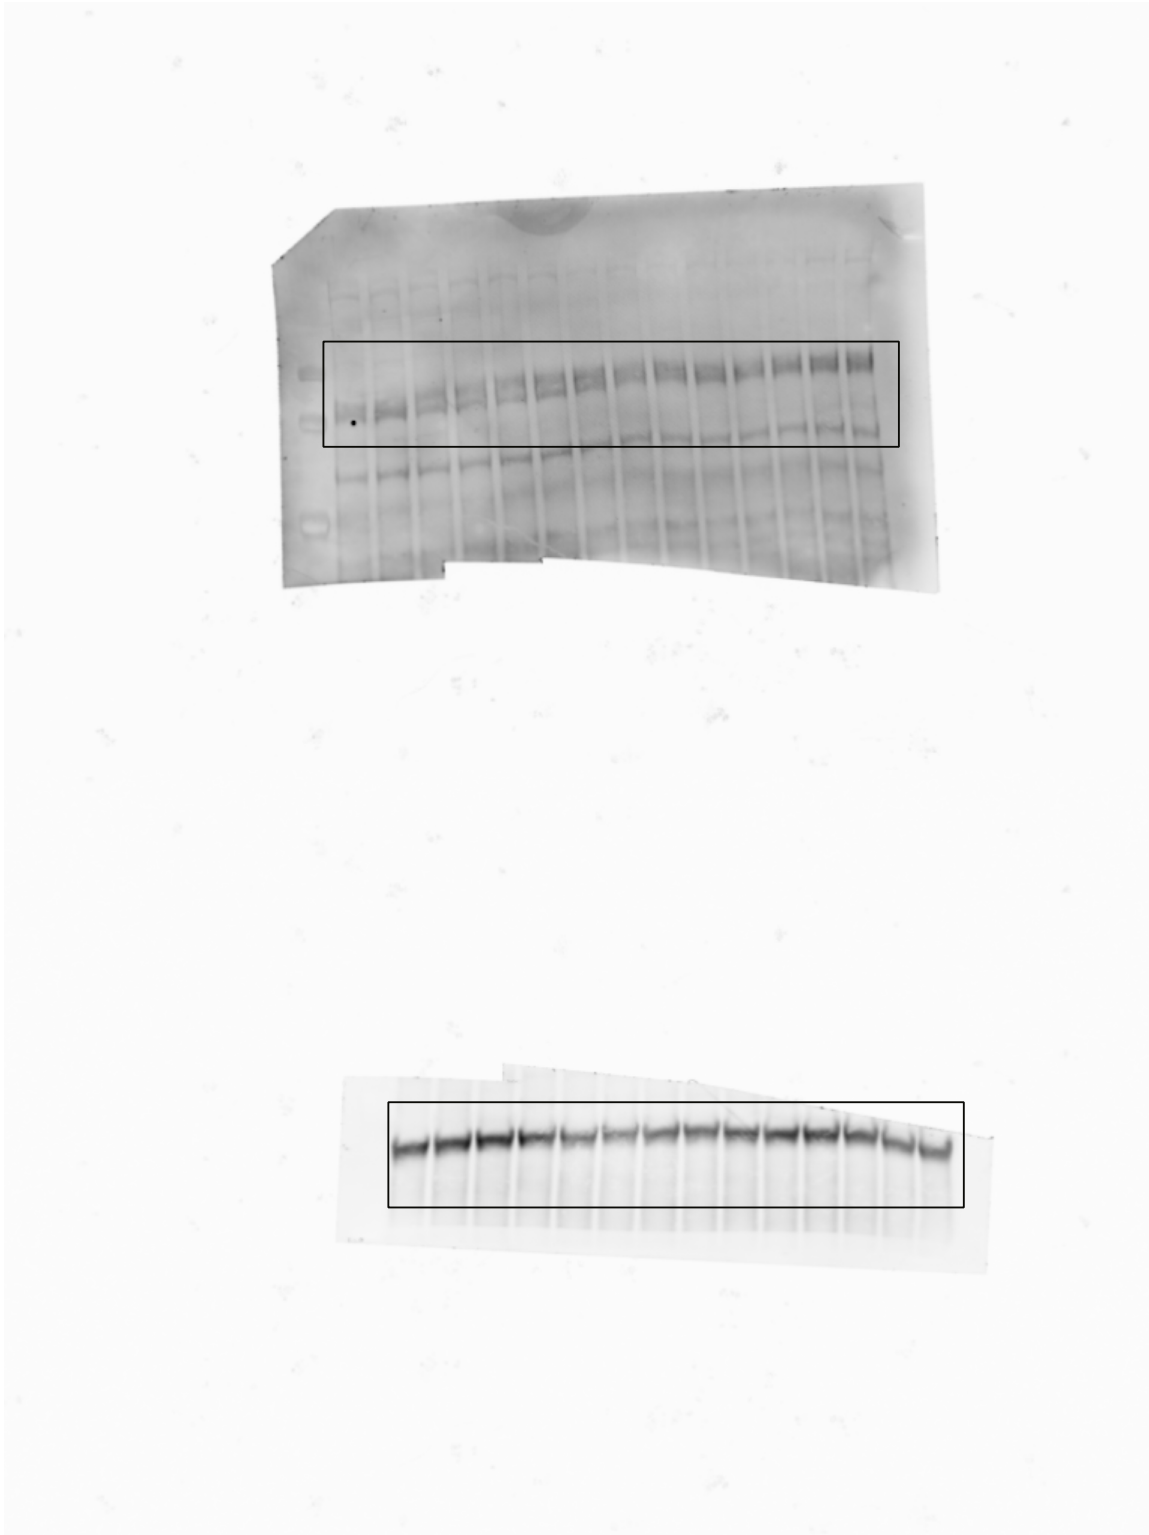

anti-V5 (Hsf1)

anti-Zwf1

Supplement: fig3-figsupp1-data1 [file elife-107157-fig3-figsupp1-data1-v1.zip]

B

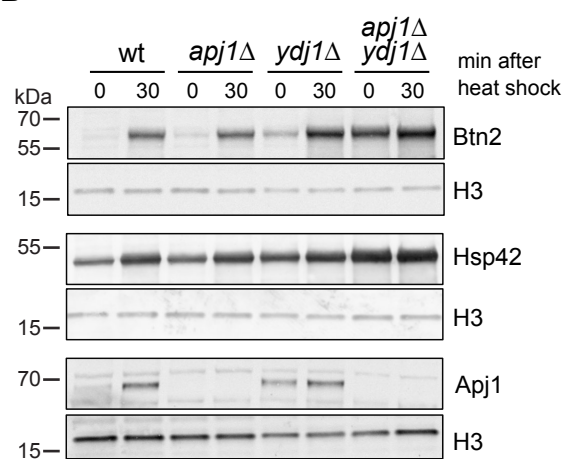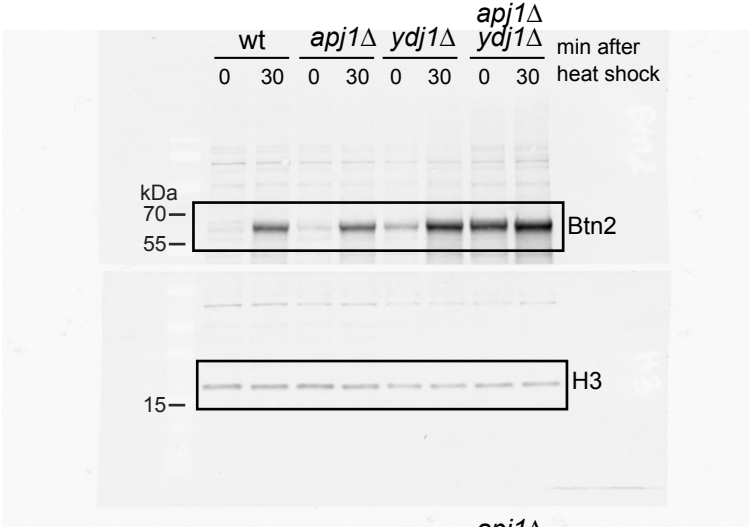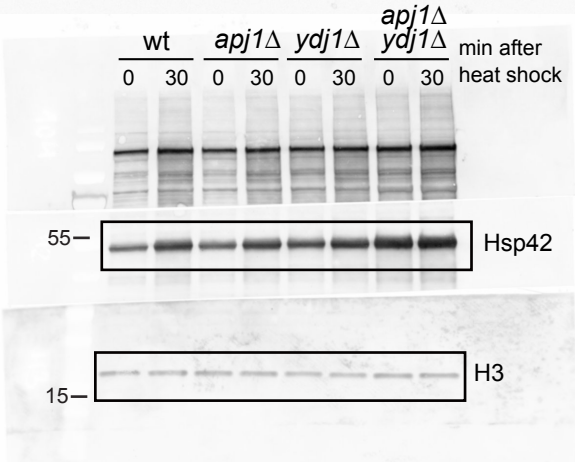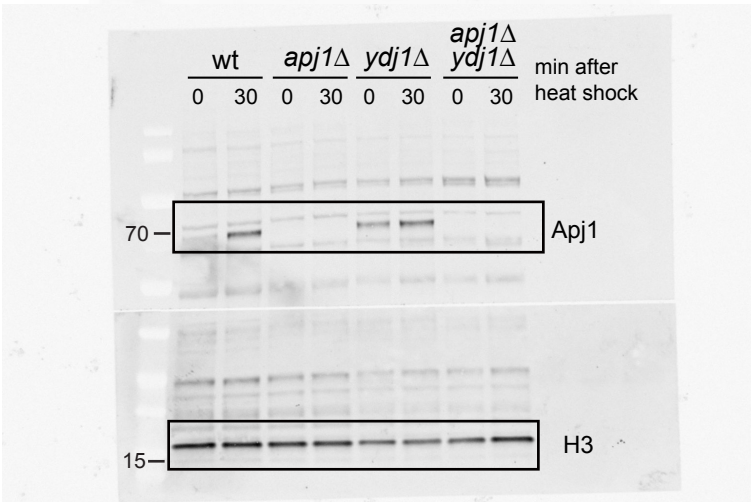

Supplement: fig5-data1 [file elife-107157-fig5-data1-v1.zip]

**Figure 6C**

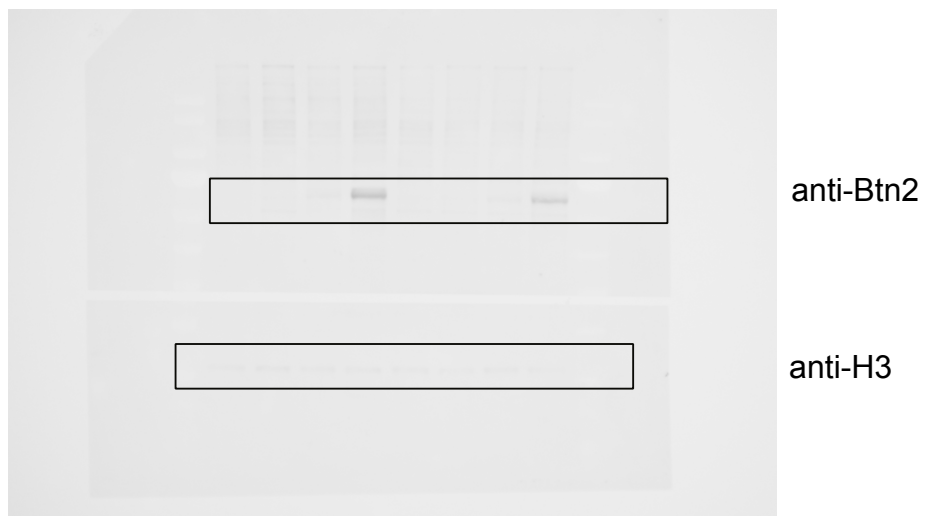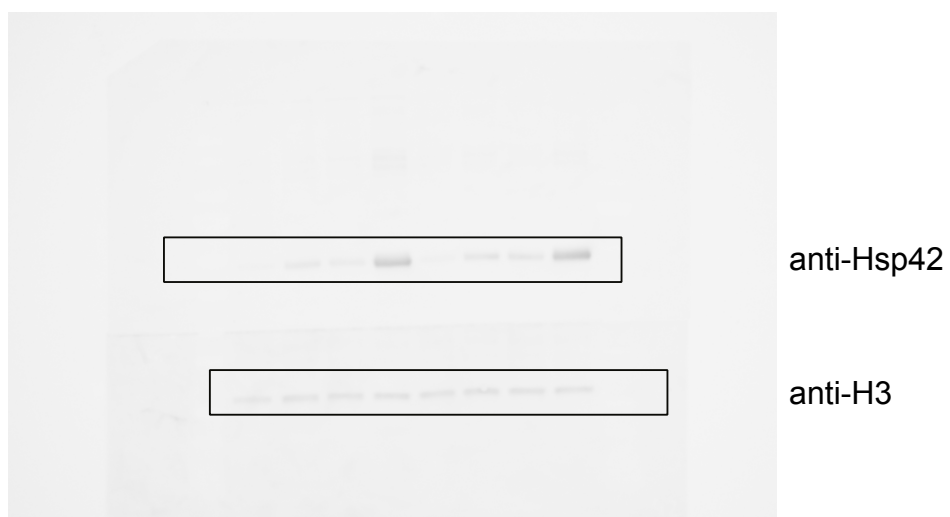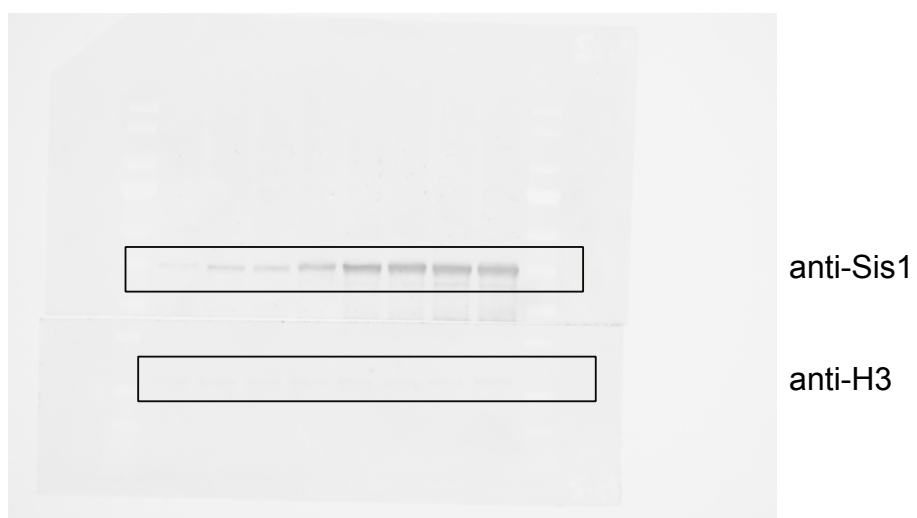

Supplement: fig6-data1 [file elife-107157-fig6-data1-v1.zip]

**Figure 6 - Figure Supplement 1C**

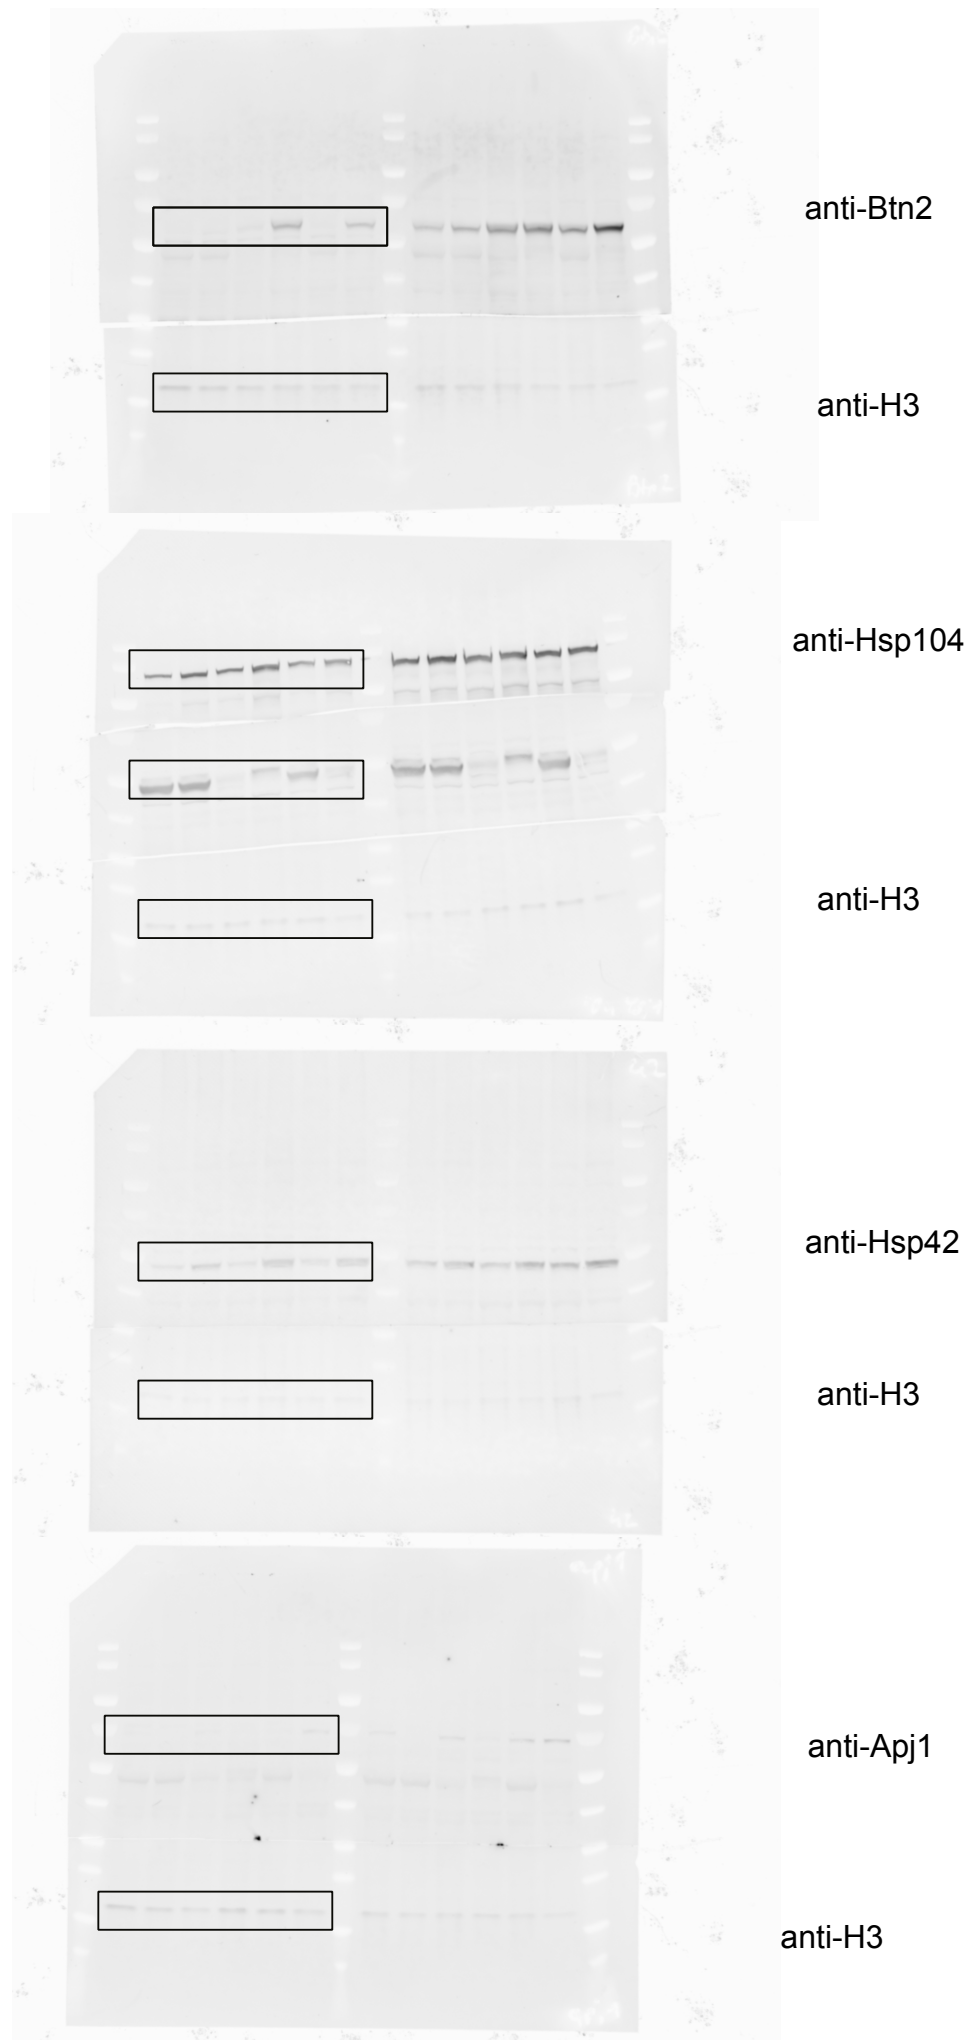

Supplement: fig6-figsupp1-data1 [file elife-107157-fig6-figsupp1-data1-v1.zip]
